# Supplementary material
Source: HighWire-hosted journal article supplement (https://bmjopen.bmj.com/content/14/12/e086904)
Supplement: inline-supplementary-material-2 [file inline-supplementary-material-2.pdf]

## Online supplementary material 2: Therapy services questionnaire

TEDI-Prem would like to check in and see if your child received any of the following therapy services in the **last month**

1. Physiotherapy: yes/no,  
If yes, on average how often:  
☐ once per week  
☐ once a fortnight  
☐ once a month  
☐ less than once a month
2. Occupational therapy: yes/no,  
If yes, on average how often:  
☐ once per week  
☐ once a fortnight  
☐ once a month  
☐ less than once a month
3. Speech Pathology: yes/no,  
If yes, on average how often:  
☐ once per week  
☐ once a fortnight  
☐ once a month  
☐ less than once a month
4. Other therapy: yes/no  
If yes, please describe: **comment box**  
On average how often:  
☐ once per week  
☐ once a fortnight  
☐ once a month  
☐ less than once a month
